# Supplementary material for: Association Between Serum Uric Acid and Development of Type 2 Diabetes
Source: Oxford University Press journal article supplement (doi:10.2337/dc09-0288), 2009-06-23
Supplement: dc090288-sup-kodama_appendix_a_090513.doc [file dc090288-sup-kodama_appendix_a_090513.doc]

**Appendix A Funnel plot after trim and fill studies.**

**
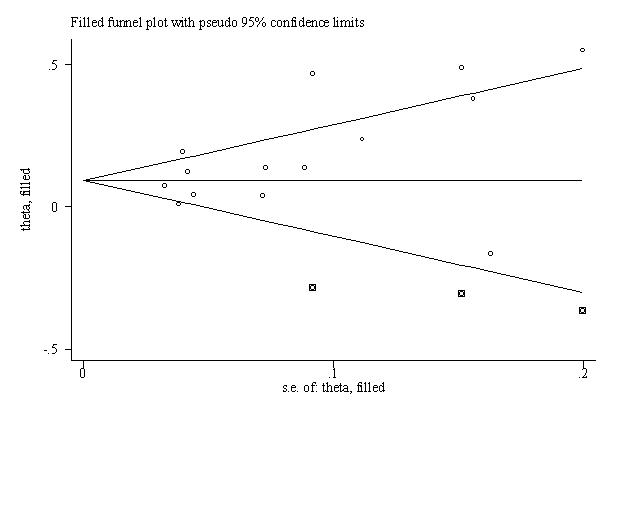
**

Natural logarithm of risk ratio (log RR) of type 2 diabetes for 1 mg/dl increase in serum uric acid is plotted against the standard error (written as “s.e.”) of log RR. As discussed in the text, thefunnel plot was asymmetrical, which suggests evidence of publication bias. The hypothetical dummy studies indicated by circles within squares are added to the genuine studies indicated by circles.
